# Supplementary material for: Condensing-enriched magnetic photonic barcodes on superhydrophobic surface for ultrasensitive multiple detection
Source: Royal Society of Chemistry journal article supplement (doi:10.1039/c9lc00223e), 2019-01-01
Supplement: c9lc00223e1.pdf [file c9lc00223e1.pdf]

## Electronic Supplementary Information

### Condensing-enriched magnetic photonic barcodes on superhydrophobic surface for ultrasensitive multiple detection

Lijun Cai, Feika Bian, Lingyu Sun, Huan Wang, Yuanjin Zhao\*

State Key Laboratory of Bioelectronics, School of Biological Science and Medical Engineering,  
Southeast University, Nanjing 210096, China.

Email: yjzhao@seu.edu.cn.

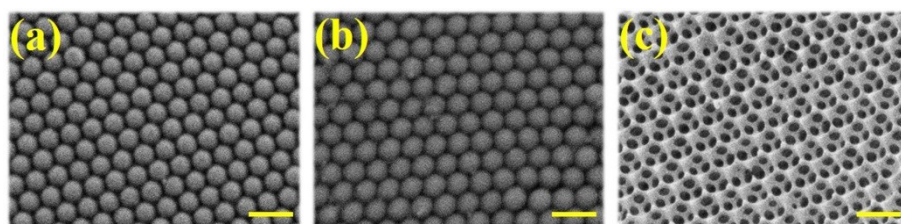

**Fig. S1** (a–c) SEM images of the SCCB template surface (a), hydrogel filling the voids of SCCBs template (b), and porous hydrogel shell surface (c). Scale bar is 500 nm.

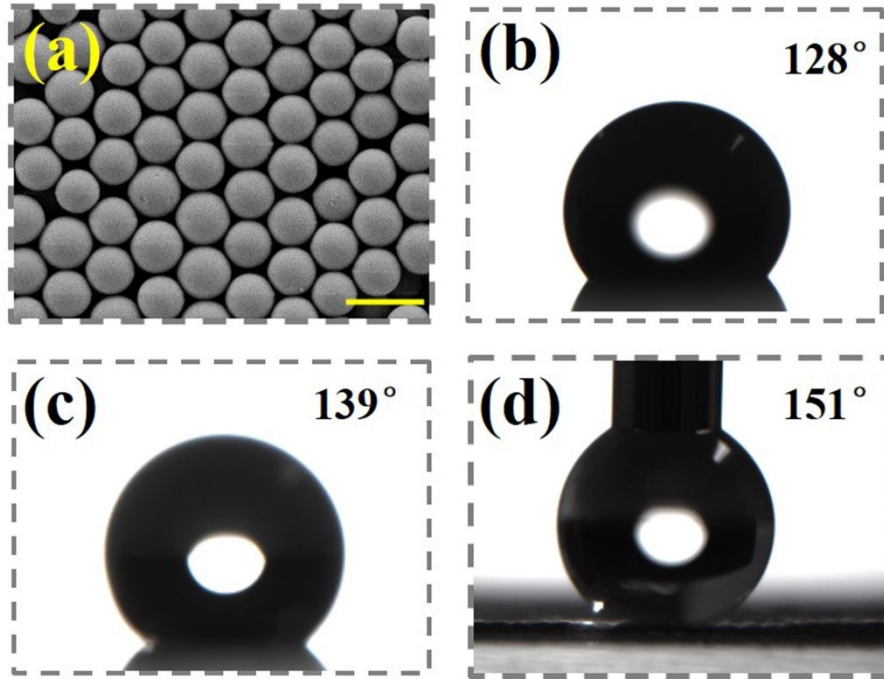

**Fig. S2** (a) SEM images of the photonic crystal film. Scale bar is 15  $\mu\text{m}$ . (b-d) Measured water contact angle of the film fabricated from silica nanoparticles with a diameter of 250 nm (b), 4  $\mu\text{m}$  (c) and 10  $\mu\text{m}$  (d).

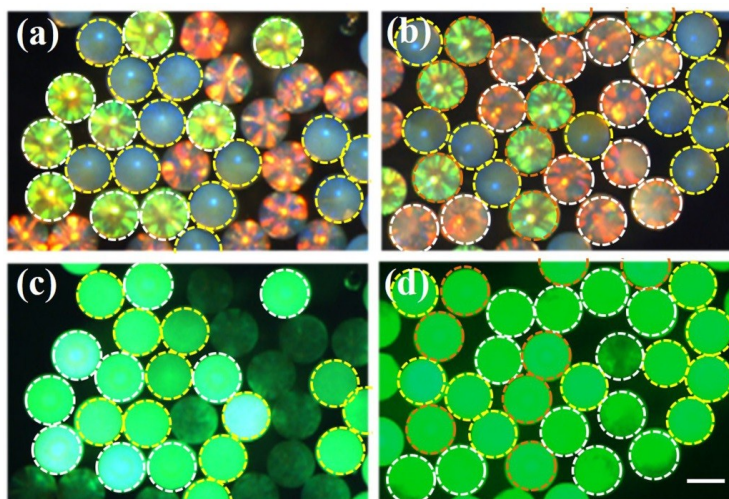

**Fig. S3** (a-b)Optical microscopy images and (c-d) fluorescence images of three kinds of PEG-DA hydrogel

PhC barcodes after incubating with two and three kinds of target miRNA; Scale bar is 200  $\mu\text{m}$ .

| oligonucleotide | sequence (5' Uo 3' )   | modification                   |        |
|-----------------|------------------------|--------------------------------|--------|
|                 |                        | 5' end                         | 3' end |
| miRNA-21        | UAGCUUAUCAGACUGAUGUUGA |                                |        |
| miRNA-205       | UCCUUCAUCCACCGGAGUCUG  |                                |        |
| miRNA-115       | ACUGAUUUCUUUUGGUGUUCAG |                                |        |
| probe-21        | GAUAAGCUAGGGCCG        | NH <sub>2</sub> C <sub>6</sub> |        |
| probe-205       | AAUGAAGGACCCAA         | NH <sub>2</sub> C <sub>6</sub> |        |
| probe-115       | GAAAUCAUGCGCGC         | NH <sub>2</sub> C <sub>6</sub> |        |
| label-21        | ACCUGGUCAACAUCA        |                                | 6-FAM  |
| label-115       | AGGGCUCAGACUCCG        |                                | 6-FAM  |
| label-205       | CCUGGGCUGAACACC        |                                | 6-FAM  |

**Tabel.S1** RNA sequences used in this study.

**Comment [A]:** To comment 1 of reviewer #1 and comment 4 of reviewer #2
